# Supplementary material for: Validation and reliability of the Dutch version of the EORTC QLQ-BLM30 module for assessing the health-related quality of life of patients with muscle invasive bladder cancer
Source: Springer Nature journal article supplement (doi:10.1186/s12955-022-02064-z), 2022-12-29
Supplement: MOESM1 [file 23865818]

# Additional file 1

**Table A.1** Patient and tumour characteristics of responders and non-respondents at baseline

|                                                           | Responders<br>(n=650) |       | Non-respondents <sup>a</sup><br>(n=892) |        | P-value |
|-----------------------------------------------------------|-----------------------|-------|-----------------------------------------|--------|---------|
| <b>Sociodemographic characteristics (at baseline)</b>     |                       |       |                                         |        |         |
| Gender, no. Male                                          | 505                   | 77.7% | 591                                     | 66.3%  | <0.0001 |
| Age, mean yr (SD)                                         | 72.9                  | (9.8) | 72.5                                    | (10.7) | 0.38    |
| Age                                                       |                       |       |                                         |        |         |
| <60                                                       | 65                    | 10.0% | 116                                     | 13.0%  | 0.29    |
| 60-<70                                                    | 151                   | 23.2% | 196                                     | 22.0%  |         |
| 70-<80                                                    | 265                   | 40.8% | 342                                     | 38.3%  |         |
| >=80                                                      | 169                   | 26.0% | 238                                     | 26.7%  |         |
| Comorbidity (CCI)                                         |                       |       |                                         |        |         |
| 0                                                         | 280                   | 43.1% | 330                                     | 37.0%  | 0.04    |
| 1                                                         | 186                   | 28.6% | 298                                     | 33.4%  |         |
| 2                                                         | 149                   | 22.9% | 217                                     | 24.3%  |         |
| >2                                                        | 35                    | 5.4%  | 47                                      | 5.3%   |         |
| SES                                                       |                       |       |                                         |        |         |
| Low                                                       | 152                   | 23.4% | 313                                     | 35.1%  | <0.0001 |
| Medium                                                    | 261                   | 40.2% | 316                                     | 35.4%  |         |
| High                                                      | 205                   | 31.5% | 207                                     | 23.2%  |         |
| Unknown                                                   | 32                    | 4.9%  | 56                                      | 6.3%   |         |
| <b>Clinical characteristics</b>                           |                       |       |                                         |        |         |
| Histology                                                 |                       |       |                                         |        | 0.18    |
| Urothelial cell carcinoma                                 | 606                   | 93.2% | 846                                     | 94.8%  |         |
| Else                                                      | 44                    | 6.8%  | 46                                      | 5.2%   |         |
| Clinical tumour stage, no.                                |                       |       |                                         |        | 0.05    |
| cT2, cN0                                                  | 430                   | 66.2% | 537                                     | 60.2%  |         |
| cT3, cN0                                                  | 119                   | 18.3% | 199                                     | 22.3%  |         |
| cT4a, cN0                                                 | 22                    | 3.4%  | 47                                      | 5.3%   |         |
| any T, cN1-2                                              | 79                    | 12.2% | 109                                     | 12.2%  |         |
| Treatment                                                 |                       |       |                                         |        | <0.0001 |
| No treatment                                              | 91                    | 14.0% | 220                                     | 24.7%  |         |
| Cystectomy with NAC                                       | 107                   | 16.5% | 139                                     | 15.6%  |         |
| Cystectomy alone                                          | 214                   | 32.9% | 234                                     | 26.2%  |         |
| Bladder sparing treatment (chemoradiation, brachytherapy) | 104                   | 16.0% | 96                                      | 10.8%  |         |
| EBRT                                                      | 112                   | 17.2% | 166                                     | 18.6%  |         |
| Systemic treatment                                        | 22                    | 3.4%  | 37                                      | 4.1%   |         |
| Urinary diversion <sup>b</sup>                            |                       |       |                                         |        | 0.28    |
| Neobladder                                                | 21                    | 6.5%  | 14                                      | 1.6%   |         |
| Indiana pouch                                             | 0                     | 0.0%  | 1                                       | 0.1%   |         |
| Bricker                                                   | 296                   | 92.2% | 349                                     | 39.1%  |         |
| Ureterocutaneous anostomy                                 | 2                     | 0.6%  | 6                                       | 0.7%   |         |
| Unknown                                                   | 2                     | 0.6%  | 3                                       | 0.3%   |         |

CCI = Charlson Comorbidity Index; SES = Socio-economic status\

<sup>a</sup> Non-respondents and respondents who did not complete the first questionnaire (n=29).

<sup>b</sup> Based on the patients treated with a radical cystectomy for respondents (n=321) and non-respondents (n=373)
