# Supplementary material for: Validation and reliability of the Dutch version of the EORTC QLQ-BLM30 module for assessing the health-related quality of life of patients with muscle invasive bladder cancer
Source: Springer Nature journal article supplement (doi:10.1186/s12955-022-02064-z), 2022-12-29
Supplement: MOESM2 [file 23865818]

## Additional file 2

**Table B.1** Fit statistics of the confirmatory factor analysis<sup>a</sup>

|                                      | CFI   | TLI   | RMSEA | SRMR  |
|--------------------------------------|-------|-------|-------|-------|
| <b>T6wk</b>                          |       |       |       |       |
| <i>Model with US</i>                 |       |       |       |       |
| Original scale structure             | 0.839 | 0.813 | 0.079 | 0.106 |
| Revision SX scale 1 (=revised scale) | 0.949 | 0.933 | 0.047 | 0.041 |
| Revision SX scale 2: 57+58           | 0.947 | 0.932 | 0.048 | 0.043 |
| <i>Model with UP</i>                 |       |       |       |       |
| Original scale structure             | 0.802 | 0.767 | 0.076 | 0.133 |
| Revision SX scale 1                  | 0.960 | 0.950 | 0.034 | 0.090 |
| Revision UP scale (=revised scale)   | 0.970 | 0.951 | 0.035 | 0.067 |
| Revision SX scale 2                  | 0.969 | 0.953 | 0.034 | 0.068 |
| <b>T6mo</b>                          |       |       |       |       |
| <i>Model with US</i>                 |       |       |       |       |
| Original scale structure             | 0.857 | 0.834 | 0.067 | 0.106 |
| Revision SX scale 1 (=revised scale) | 0.943 | 0.925 | 0.045 | 0.059 |
| Revision SX scale 2: 57+58           | 0.944 | 0.929 | 0.044 | 0.062 |
| <i>Model with UP</i>                 |       |       |       |       |
| Original scale structure             | 0.824 | 0.793 | 0.069 | 0.104 |
| Revision SX scale 1                  | 0.934 | 0.912 | 0.045 | 0.073 |
| Revision UP scale (=revised scale)   | 0.954 | 0.926 | 0.041 | 0.049 |
| Revision SX scale 2                  | 0.955 | 0.932 | 0.039 | 0.053 |
| <b>T12mo</b>                         |       |       |       |       |
| <i>Model with US</i>                 |       |       |       |       |
| Original scale structure             | 0.807 | 0.776 | 0.078 | 0.112 |
| Revision SX scale 1 (=revised scale) | 0.920 | 0.895 | 0.053 | 0.133 |
| Revision SX scale 2: 57+58           | 0.920 | 0.900 | 0.052 | 0.143 |
| <i>Model with UP</i>                 |       |       |       |       |
| Original scale structure             | 0.781 | 0.743 | 0.079 | 0.113 |
| Revision SX scale 1                  | 0.923 | 0.896 | 0.051 | 0.076 |
| Revision UP scale (=revised scale)   | 0.935 | 0.895 | 0.051 | 0.069 |
| Revision SX scale 2                  | 0.933 | 0.899 | 0.050 | 0.068 |

CFI = Comparative Fit Index; mo = month; UP = Urostomy problems; RMSEA = Root Mean Square Error of Approximation; SRMR = Standardized Root Mean Square Residual; SX = Sexual functioning; TLI = Tucker-Lewis Index; wk = week

<sup>a</sup> The items 44 and 60 were not included in the confirmatory factor analysis due to the high number of missing responses.

**Table B.2** Number of missing responses, floor and ceiling effects, convergent and discriminant validity of the original scale structure of the EORTC-QLQ-BLM30 at T6wk (N=650)

| Item             | Hypothesized scale | Missings |       | Floor |                  | Ceiling |                  | Convergent validity | Divergent validity |
|------------------|--------------------|----------|-------|-------|------------------|---------|------------------|---------------------|--------------------|
|                  |                    | N        | (%)   | N     | (%) <sup>a</sup> | N       | (%) <sup>a</sup> |                     |                    |
| Q31              | US                 | 104      | 16.0% | 84    | 15.4%            | 63      | 11.5%            | 0.66                | 0.01 to 0.15       |
| Q32              | US                 | 107      | 16.5% | 67    | 12.3%            | 84      | 15.5%            | 0.72                | -0.01 to 0.19      |
| Q33              | US                 | 107      | 16.5% | 167   | 30.8%            | 68      | 12.5%            | 0.72                | 0.05 to 0.19       |
| Q34              | US                 | 110      | 16.9% | 242   | 44.8%            | 42      | 7.8%             | 0.70                | 0.03 to 0.21       |
| Q35              | US                 | 106      | 16.3% | 297   | 54.6%            | 22      | 4.0%             | 0.69                | 0.03 to 0.29       |
| Q36              | US                 | 109      | 16.8% | 345   | 63.8%            | 17      | 3.1%             | 0.55                | 0.08 to 0.24       |
| Q37              | US                 | 107      | 16.5% | 265   | 48.8%            | 38      | 7.0%             | 0.51                | 0.03 to 0.26       |
| Q38 <sup>b</sup> | UP                 | 598      | 92.0% | 29    | 55.8%            | 3       | 5.8%             | 0.36                | -0.06 to 0.25      |
| Q39 <sup>b</sup> | UP                 | 600      | 92.3% | 21    | 42.0%            | 7       | 14.0%            | 0.64                | 0.07 to 0.48       |
| Q40 <sup>b</sup> | UP                 | 598      | 92.0% | 19    | 36.5%            | 2       | 3.8%             | 0.45                | 0.00 to 0.26       |
| Q41 <sup>b</sup> | UP                 | 599      | 92.2% | 29    | 56.9%            | 5       | 9.8%             | 0.50                | 0.02 to 0.43       |
| Q42 <sup>b</sup> | UP                 | 598      | 92.0% | 6     | 11.5%            | 17      | 32.7%            | 0.48                | -0.07 to 0.29      |
| Q43 <sup>b</sup> | UP                 | 599      | 92.2% | 17    | 33.3%            | 5       | 9.8%             | 0.35                | 0.13 to 0.43       |
| Q44              | CAT                | 565      | 86.9% | 44    | 51.8%            | 11      | 12.9%            |                     | -0.04 to 0.46      |
| Q45              | FP                 | 11       | 1.7%  | 83    | 13.0%            | 50      | 7.8%             | 0.77                | 0.08 to 0.38       |
| Q46              | FP                 | 14       | 2.2%  | 115   | 18.1%            | 58      | 9.1%             | 0.82                | 0.09 to 0.36       |
| Q47              | FP                 | 15       | 2.3%  | 128   | 20.2%            | 67      | 10.6%            | 0.78                | 0.10 to 0.36       |
| Q48              | BAF                | 14       | 2.2%  | 444   | 69.8%            | 12      | 1.9%             | 0.37                | 0.01 to 0.28       |
| Q49              | BAF                | 15       | 2.3%  | 324   | 51.0%            | 9       | 1.4%             | 0.37                | 0.08 to 0.21       |
| Q50              | BI                 | 16       | 2.5%  | 452   | 71.3%            | 11      | 1.7%             | 0.64                | 0.18 to 0.46       |
| Q51              | BI                 | 16       | 2.5%  | 421   | 66.4%            | 16      | 2.5%             | 0.54                | 0.08 to 0.35       |
| Q52              | BI                 | 17       | 2.6%  | 455   | 71.9%            | 8       | 1.3%             | 0.67                | 0.17 to 0.32       |
| Q53              | SX                 | 108      | 16.6% | 326   | 60.1%            | 2       | 0.4%             | 0.23                | -0.17 to -0.04     |
| Q54              | SX                 | 113      | 17.4% | 358   | 66.7%            | 1       | 0.2%             | 0.27                | -0.15 to 0.03      |
| Q55              | SX                 | 268      | 41.2% | 171   | 44.8%            | 71      | 18.6%            | 0.39                | -0.01 to 0.11      |
| Q56              | SX                 | 313      | 48.2% | 184   | 54.6%            | 61      | 18.1%            | 0.34                | 0.08 to 0.17       |
| Q57              | SX                 | 306      | 47.1% | 234   | 68.0%            | 13      | 3.8%             | 0.30                | 0.03 to 0.51       |
| Q58              | SX                 | 319      | 49.1% | 235   | 71.0%            | 15      | 4.5%             | 0.31                | -0.01 to 0.27      |
| Q59              | SX                 | 334      | 51.4% | 157   | 49.7%            | 29      | 9.2%             | 0.22                | -0.35 to 0.00      |
| Q60              | SX                 | 605      | 93.1% | 27    | 60.0%            | 1       | 2.2%             | 0.56                | -0.28 to 0.37      |

<sup>a</sup> Percentage of the patients with non-missing data<sup>b</sup> Only a small number of patients had undergone a radical cystectomy at T6wk, and therefore, the scores of the UP scale should be interpreted with some caution.

**Table B.3** Number of missing responses, floor and ceiling effects, convergent and discriminant validity of the original scale structure of the EORTC-QLQ-BLM30 at T6mo (N=396)

| Item | Hypothesized scale | Missings |       | Floor |                  | Ceiling |                  | Convergent validity | Divergent validity |
|------|--------------------|----------|-------|-------|------------------|---------|------------------|---------------------|--------------------|
|      |                    | N        | (%)   | N     | (%) <sup>a</sup> | N       | (%) <sup>a</sup> |                     |                    |
| Q31  | US                 | 202      | 51.0% | 31    | 16.0%            | 23      | 11.9%            | 0.72                | -0.02 to 0.31      |
| Q32  | US                 | 204      | 51.5% | 25    | 13.0%            | 33      | 17.2%            | 0.75                | 0.10 to 0.37       |
| Q33  | US                 | 204      | 51.5% | 71    | 37.0%            | 27      | 14.1%            | 0.76                | 0.04 to 0.33       |
| Q34  | US                 | 203      | 51.3% | 87    | 45.1%            | 15      | 7.8%             | 0.71                | 0.19 to 0.36       |
| Q35  | US                 | 202      | 51.0% | 103   | 53.1%            | 11      | 5.7%             | 0.74                | 0.21 to 0.36       |
| Q36  | US                 | 202      | 51.0% | 118   | 60.8%            | 7       | 3.6%             | 0.53                | 0.11 to 0.37       |
| Q37  | US                 | 202      | 51.0% | 120   | 61.9%            | 7       | 3.6%             | 0.55                | 0.01 to 0.62       |
| Q38  | UP                 | 227      | 57.3% | 116   | 68.6%            | 3       | 1.8%             | 0.44                | -0.18 to 0.25      |
| Q39  | UP                 | 229      | 57.8% | 130   | 77.8%            | 3       | 1.8%             | 0.49                | -0.07 to 0.38      |
| Q40  | UP                 | 226      | 57.1% | 83    | 48.8%            | 6       | 3.5%             | 0.14                | -0.09 to 0.13      |
| Q41  | UP                 | 226      | 57.1% | 120   | 70.6%            | 1       | 0.6%             | 0.14                | -0.13 to 0.42      |
| Q42  | UP                 | 226      | 57.1% | 89    | 52.4%            | 14      | 8.2%             | 0.39                | -0.04 to 0.34      |
| Q43  | UP                 | 232      | 58.6% | 81    | 49.4%            | 1       | 0.6%             | 0.58                | -0.13 to 0.23      |
| Q44  | CAT                | 369      | 93.2% | 18    | 66.7%            | 1       | 3.7%             |                     | -0.10 to 0.37      |
| Q45  | FP                 | 8        | 2.0%  | 102   | 26.3%            | 13      | 3.4%             | 0.75                | -0.07 to 0.35      |
| Q46  | FP                 | 8        | 2.0%  | 134   | 34.5%            | 9       | 2.3%             | 0.82                | -0.10 to 0.44      |
| Q47  | FP                 | 12       | 3.0%  | 151   | 39.3%            | 9       | 2.3%             | 0.79                | -0.09 to 0.38      |
| Q48  | BAF                | 9        | 2.3%  | 297   | 76.7%            | 2       | 0.5%             | 0.37                | 0.08 to 0.49       |
| Q49  | BAF                | 16       | 4.0%  | 185   | 48.7%            | 8       | 2.1%             | 0.37                | 0.04 to 0.28       |
| Q50  | BI                 | 12       | 3.0%  | 242   | 63.0%            | 8       | 2.1%             | 0.70                | 0.04 to 0.30       |
| Q51  | BI                 | 13       | 3.3%  | 230   | 60.1%            | 7       | 1.8%             | 0.57                | 0.10 to 0.45       |
| Q52  | BI                 | 12       | 3.0%  | 211   | 54.9%            | 11      | 2.9%             | 0.60                | 0.11 to 0.29       |
| Q53  | SX                 | 91       | 23.0% | 164   | 53.8%            | 4       | 1.3%             | 0.12                | -0.22 to -0.01     |
| Q54  | SX                 | 93       | 23.5% | 205   | 67.7%            | 0       | 0.0%             | 0.11                | -0.21 to -0.03     |
| Q55  | SX                 | 173      | 43.7% | 86    | 38.6%            | 81      | 36.3%            | 0.43                | -0.19 to 0.27      |
| Q56  | SX                 | 201      | 50.8% | 69    | 35.4%            | 77      | 39.5%            | 0.40                | -0.10 to 0.25      |
| Q57  | SX                 | 220      | 55.6% | 107   | 60.8%            | 7       | 4.0%             | 0.22                | -0.19 to 0.36      |
| Q58  | SX                 | 227      | 57.3% | 120   | 71.0%            | 9       | 5.3%             | 0.26                | -0.14 to 0.27      |
| Q59  | SX                 | 229      | 57.8% | 74    | 44.3%            | 11      | 6.6%             | 0.14                | -0.24 to 0.37      |
| Q60  | SX                 | 381      | 96.2% | 10    | 66.7%            | 1       | 6.7%             | 0.22                | -0.24 to 0.58      |

<sup>a</sup> Percentage of the patients with non-missing data

**Table B.4** Number of missing responses, floor and ceiling effects, convergent and discriminant validity of the original scale structure of the EORTC-QLQ-BLM30 at T12mo (N=357)

| Item | Hypothesized scale | Missings |       | Floor |                  | Ceiling |                  | Convergent validity | Divergent validity |
|------|--------------------|----------|-------|-------|------------------|---------|------------------|---------------------|--------------------|
|      |                    | N        | (%)   | N     | (%) <sup>a</sup> | N       | (%) <sup>a</sup> |                     |                    |
| Q31  | US                 | 214      | 59.9% | 38    | 26.6%            | 12      | 8.4%             | 0.68                | -0.36 to 0.35      |
| Q32  | US                 | 213      | 59.7% | 28    | 19.4%            | 16      | 11.1%            | 0.75                | -0.40 to 0.33      |
| Q33  | US                 | 212      | 59.4% | 64    | 44.1%            | 14      | 9.7%             | 0.67                | -0.31 to 0.44      |
| Q34  | US                 | 216      | 60.5% | 80    | 56.7%            | 6       | 4.3%             | 0.65                | -0.31 to 0.37      |
| Q35  | US                 | 217      | 60.8% | 90    | 64.3%            | 7       | 5.0%             | 0.77                | -0.21 to 0.39      |
| Q36  | US                 | 214      | 59.9% | 91    | 63.6%            | 8       | 5.6%             | 0.71                | -0.24 to 0.39      |
| Q37  | US                 | 214      | 59.9% | 95    | 66.4%            | 7       | 4.9%             | 0.64                | -0.13 to 0.38      |
| Q38  | UP                 | 176      | 49.3% | 132   | 72.9%            | 1       | 0.6%             | 0.41                | -0.03 to 0.24      |
| Q39  | UP                 | 176      | 49.3% | 155   | 85.6%            | 2       | 1.1%             | 0.54                | -0.07 to 0.16      |
| Q40  | UP                 | 175      | 49.0% | 97    | 53.3%            | 0       | 0.0%             | 0.31                | 0.02 to 0.09       |
| Q41  | UP                 | 175      | 49.0% | 139   | 76.4%            | 0       | 0.0%             | 0.34                | 0.11 to 0.31       |
| Q42  | UP                 | 174      | 48.7% | 124   | 67.8%            | 12      | 6.6%             | 0.31                | 0.02 to 0.22       |
| Q43  | UP                 | 175      | 49.0% | 112   | 61.5%            | 4       | 2.2%             | 0.53                | 0.05 to 0.20       |
| Q44  | CAT                | 333      | 93.3% | 18    | 75.0%            | 2       | 8.3%             |                     | -0.30 to 0.13      |
| Q45  | FP                 | 13       | 3.6%  | 116   | 33.7%            | 9       | 2.6%             | 0.70                | -0.12 to 0.45      |
| Q46  | FP                 | 14       | 3.9%  | 135   | 39.4%            | 5       | 1.5%             | 0.80                | -0.04 to 0.40      |
| Q47  | FP                 | 14       | 3.9%  | 168   | 49.0%            | 5       | 1.5%             | 0.76                | -0.08 to 0.33      |
| Q48  | BAF                | 16       | 4.5%  | 271   | 79.5%            | 1       | 0.3%             | 0.37                | 0.00 to 0.36       |
| Q49  | BAF                | 18       | 5.0%  | 184   | 54.3%            | 6       | 1.8%             | 0.37                | -0.03 to 0.23      |
| Q50  | BI                 | 16       | 4.5%  | 220   | 64.5%            | 6       | 1.8%             | 0.70                | -0.11 to 0.36      |
| Q51  | BI                 | 15       | 4.2%  | 230   | 67.3%            | 7       | 2.0%             | 0.61                | -0.07 to 0.44      |
| Q52  | BI                 | 16       | 4.5%  | 191   | 56.0%            | 9       | 2.6%             | 0.64                | -0.29 to 0.33      |
| Q53  | SX                 | 86       | 24.1% | 130   | 48.0%            | 7       | 2.6%             | 0.20                | -0.31 to -0.10     |
| Q54  | SX                 | 92       | 25.8% | 164   | 61.9%            | 0       | 0.0%             | 0.10                | -0.30 to -0.01     |
| Q55  | SX                 | 172      | 48.2% | 83    | 44.9%            | 60      | 32.4%            | 0.39                | -0.01 to 0.27      |
| Q56  | SX                 | 192      | 53.8% | 64    | 38.8%            | 58      | 35.2%            | 0.34                | -0.10 to 0.25      |
| Q57  | SX                 | 199      | 55.7% | 100   | 63.3%            | 6       | 3.8%             | 0.27                | -0.25 to 0.36      |
| Q58  | SX                 | 210      | 58.8% | 106   | 72.1%            | 8       | 5.4%             | 0.28                | -0.38 to 0.16      |
| Q59  | SX                 | 212      | 59.4% | 56    | 38.6%            | 17      | 11.7%            | 0.26                | -0.28 to -0.13     |
| Q60  | SX                 | 337      | 94.4% | 11    | 55.0%            | 2       | 10.0%            | 0.15                | -0.06 to 0.07      |

<sup>a</sup> Percentage of the patients with non-missing data

**Table B.5** Number of missing responses, floor and ceiling effects, convergent and discriminant validity of the original scale structure of the EORTC-QLQ-BLM30 at T24mo (N=277)

| Item | Hypothesized scale | Missings |       | Floor |                  | Ceiling |                  | Convergent validity | Divergent validity |
|------|--------------------|----------|-------|-------|------------------|---------|------------------|---------------------|--------------------|
|      |                    | N        | (%)   | N     | (%) <sup>a</sup> | N       | (%) <sup>a</sup> |                     |                    |
| Q31  | US                 | 183      | 66.1% | 32    | 34.0%            | 7       | 7.4%             | 0.75                | 0.05 to 0.45       |
| Q32  | US                 | 185      | 66.8% | 22    | 23.9%            | 10      | 10.9%            | 0.67                | -0.20 to 0.45      |
| Q33  | US                 | 184      | 66.4% | 47    | 50.5%            | 8       | 8.6%             | 0.78                | -0.06 to 0.82      |
| Q34  | US                 | 186      | 67.1% | 54    | 59.3%            | 5       | 5.5%             | 0.71                | -0.24 to 0.51      |
| Q35  | US                 | 184      | 66.4% | 63    | 67.7%            | 5       | 5.4%             | 0.74                | 0.14 to 0.65       |
| Q36  | US                 | 186      | 67.1% | 55    | 60.4%            | 2       | 2.2%             | 0.55                | 0.14 to 0.89       |
| Q37  | US                 | 185      | 66.8% | 72    | 78.3%            | 2       | 2.2%             | 0.41                | -0.28 to 0.36      |
| Q38  | UP                 | 118      | 42.6% | 118   | 74.2%            | 0       | 0.0%             | 0.38                | -0.03 to 0.18      |
| Q39  | UP                 | 120      | 43.3% | 142   | 90.4%            | 1       | 0.6%             | 0.36                | -0.08 to 0.00      |
| Q40  | UP                 | 118      | 42.6% | 86    | 54.1%            | 1       | 0.6%             | 0.34                | -0.01 to 0.16      |
| Q41  | UP                 | 118      | 42.6% | 131   | 82.4%            | 0       | 0.0%             | 0.19                | 0.03 to 0.42       |
| Q42  | UP                 | 119      | 43.0% | 116   | 73.4%            | 12      | 7.6%             | 0.38                | 0.03 to 0.25       |
| Q43  | UP                 | 120      | 43.3% | 108   | 68.8%            | 2       | 1.3%             | 0.60                | -0.07 to 0.31      |
| Q44  | CAT                | 261      | 94.2% | 12    | 75.0%            | 0       | 0.0%             |                     | -0.15 to 0.63      |
| Q45  | FP                 | 12       | 4.3%  | 111   | 41.9%            | 8       | 3.0%             | 0.79                | -0.04 to 0.47      |
| Q46  | FP                 | 12       | 4.3%  | 134   | 50.6%            | 7       | 2.6%             | 0.82                | 0.00 to 0.40       |
| Q47  | FP                 | 11       | 4.0%  | 159   | 59.8%            | 4       | 1.5%             | 0.79                | 0.07 to 0.48       |
| Q48  | BAF                | 10       | 3.6%  | 221   | 82.8%            | 0       | 0.0%             | 0.32                | -0.07 to 0.54      |
| Q49  | BAF                | 15       | 5.4%  | 136   | 51.9%            | 1       | 0.4%             | 0.32                | 0.04 to 0.24       |
| Q50  | BI                 | 11       | 4.0%  | 167   | 62.8%            | 4       | 1.5%             | 0.69                | 0.15 to 0.43       |
| Q51  | BI                 | 13       | 4.7%  | 170   | 64.4%            | 6       | 2.3%             | 0.62                | 0.09 to 0.47       |
| Q52  | BI                 | 12       | 4.3%  | 145   | 54.7%            | 10      | 3.8%             | 0.60                | -0.10 to 0.32      |
| Q53  | SX                 | 75       | 27.1% | 93    | 46.0%            | 2       | 1.0%             | 0.05                | -0.46 to 0.11      |
| Q54  | SX                 | 77       | 27.8% | 121   | 60.5%            | 0       | 0.0%             | 0.04                | -0.43 to 0.09      |
| Q55  | SX                 | 129      | 46.6% | 61    | 41.2%            | 54      | 36.5%            | 0.45                | -0.08 to 0.21      |
| Q56  | SX                 | 148      | 53.4% | 50    | 38.8%            | 46      | 35.7%            | 0.43                | -0.12 to 0.21      |
| Q57  | SX                 | 157      | 56.7% | 78    | 65.0%            | 7       | 5.8%             | 0.12                | -0.07 to 0.52      |
| Q58  | SX                 | 166      | 59.9% | 83    | 74.8%            | 3       | 2.7%             | -0.03               | -0.22 to 0.34      |
| Q59  | SX                 | 167      | 60.3% | 33    | 30.0%            | 11      | 10.0%            | 0.17                | -0.40 to -0.15     |
| Q60  | SX                 | 262      | 94.6% | 4     | 26.7%            | 4       | 26.7%            | 0.43                | -0.14 to 0.56      |

<sup>a</sup> Percentage of the patients with non-missing data
